# Supplementary material for: Active Hexose-Correlated Compound Shows Direct and Indirect Effects against Chronic Lymphocytic Leukemia
Source: MDPI journal article supplement (doi:10.3390/nu15245138), 2023-12-18
Supplement: s1 [file s1]

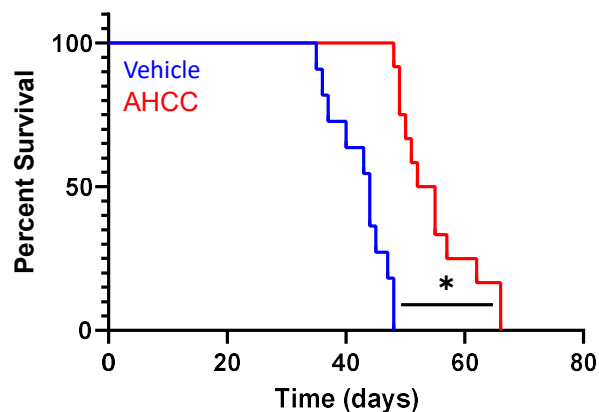

**Figure S1. AHCC increases survival in an immune-competent mouse model of AML.**  $0.75 \times 10^6$  MII<sup>PTD/WT</sup>Flt3<sup>ITD/WT</sup> splenocytes from diseased mice (Lys5.2) were injected intravenously into Lys5.1 C57Bl/6J mice. After one week, mice were gavaged 3 times per week with PBS (Vehicle, n=11) or with 600 mg/kg AHCC (n=12). Survival was counted as time until meeting early-removal criteria. \*  $p \leq 0.0001$ .

| Patient ID | Age | WBC<br>(10 <sup>3</sup> /μL) | Previous<br>Treatment | IGHV<br>mutation<br>status | Cytogenetics                    |
|------------|-----|------------------------------|-----------------------|----------------------------|---------------------------------|
| Patient 1  | 63  | 24.32                        | none                  | Mutated<br>(4.6%)          | del13q                          |
| Patient 2  | 78  | 34.75                        | none                  | Mutated<br>(7.9%)          | del13q                          |
| Patient 3  | 59  | 12.32                        | none                  | Unmutated<br>(1.4%)        | del13q                          |
| Patient 4  | 80  | 6.24                         | none                  | Mutated<br>(6.1%)          | trisomy 12                      |
| Patient 5  | 68  | 25.69                        | none                  | Unknown                    | del13q                          |
| Patient 6  | 76  | 16.55                        | none                  | Unknown                    | Unknown                         |
| Patient 7  | 51  | 15.74                        | none                  | Mutated<br>(4.8%)          | del13q(41.7%)/<br>nul13q(7.3%)  |
| Patient 8  | 61  | 24.40                        | none                  | Mutated<br>(9.7%)          | del13q                          |
| Patient 9  | 76  | 12.36                        | none                  | Mutated<br>(6.8%)          | del13q(73.6%)/<br>nul13q(11.8%) |
| Patient 10 | 73  | 11.45                        | none*                 | Unknown                    | nul13q                          |

**Table S1. Characteristics of CLL patients who donated samples for this study.** 5 patients were male and 5 female, and average age was  $68.5 \pm 9.6$  years. \* Patient was treated with acalabrutinib and steroids during hospitalization in July 2020 for COVID-19. Patient is considered treatment-naïve for CLL.
